# Supplementary material
Source: PubMed Central journal article supplement (PMC4479218)
Supplement: NIHMS669479-supplement-01.pdf [file NIHMS669479-supplement-01.pdf]

## **Supplementary appendix**

This appendix formed part of the original submission and has been peer reviewed. We post it as supplied by the authors.

Supplement to: Penson RT, Huang HQ, Wenzel LB, et al. Bevacizumab for advanced cervical cancer: patient-reported outcomes of a randomised, phase 3 trial (NRG Oncology–Gynecologic Oncology Group protocol 240). *Lancet Oncol* 2015; published online January 29. [http://dx.doi.org/10.1016/S1470-2045\(15\)70004-5](http://dx.doi.org/10.1016/S1470-2045(15)70004-5).

**Characteristics of Evaluable Patients (NRG 240)**

| Characteristics                             | CIS+PAC |    | CIS+PAC+BEV |    | TOP+PAC |    | TOP+PAC+BEV |    |
|---------------------------------------------|---------|----|-------------|----|---------|----|-------------|----|
|                                             | n=99    |    | n=98        |    | n=95    |    | n=98        |    |
|                                             | N       | %  | N           | %  | N       | %  | N           | %  |
| <b>Age Group</b>                            |         |    |             |    |         |    |             |    |
| <=39                                        | 9       | 9  | 12          | 12 | 11      | 12 | 12          | 12 |
| 40-49                                       | 34      | 34 | 31          | 32 | 33      | 35 | 23          | 23 |
| 50-59                                       | 24      | 24 | 29          | 30 | 25      | 26 | 38          | 39 |
| 60-69                                       | 20      | 20 | 15          | 15 | 21      | 22 | 20          | 20 |
| >=70                                        | 12      | 12 | 11          | 11 | 5       | 5  | 5           | 5  |
| <b>Race</b>                                 |         |    |             |    |         |    |             |    |
| Asian                                       | 3       | 3  | 7           | 7  | 2       | 2  | 5           | 5  |
| Black                                       | 10      | 10 | 16          | 16 | 11      | 12 | 15          | 15 |
| Other                                       | 5       | 5  | 3           | 3  | 7       | 7  | 5           | 5  |
| White                                       | 81      | 82 | 72          | 73 | 75      | 79 | 73          | 74 |
| <b>Ethnic origin</b>                        |         |    |             |    |         |    |             |    |
| Hispanic                                    | 15      | 15 | 12          | 12 | 10      | 11 | 10          | 10 |
| Non-Hispanic                                | 79      | 80 | 80          | 82 | 82      | 86 | 85          | 87 |
| Other/Unspecified                           | 5       | 5  | 6           | 6  | 3       | 3  | 3           | 3  |
| <b>Performance Status</b>                   |         |    |             |    |         |    |             |    |
| 0                                           | 61      | 62 | 58          | 59 | 60      | 63 | 58          | 59 |
| 1                                           | 38      | 38 | 40          | 41 | 35      | 37 | 40          | 41 |
| <b>Disease Status</b>                       |         |    |             |    |         |    |             |    |
| IV                                          | 18      | 18 | 17          | 17 | 18      | 19 | 15          | 15 |
| Persistent                                  | 3       | 3  | 14          | 14 | 14      | 15 | 12          | 12 |
| Recurrent                                   | 78      | 79 | 67          | 68 | 63      | 66 | 71          | 72 |
| <b>Previous Platinum-containing therapy</b> |         |    |             |    |         |    |             |    |
| Yes                                         | 71      | 72 | 73          | 74 | 68      | 72 | 74          | 76 |
| No                                          | 28      | 28 | 25          | 26 | 27      | 28 | 24          | 24 |

**Number of QOL assessments completed by treatment groups (NRG 240)**

| Baseline | # Assessment completed | CIS+PAC | CIS+PAC+BEV | TOP+PAC | TOP+PAC+BEV |
|----------|------------------------|---------|-------------|---------|-------------|
| No       | 0                      | 3       | 3           | 3       | 5           |
|          | 1                      | 3       | 2           | 0       | 0           |
|          | 2                      | 0       | 0           | 2       | 1           |
|          | 3                      | 0       | 0           | 0       | 1           |
|          | 4                      | 1       | 1           | 0       | 1           |
| Yes      | 1                      | 8       | 11          | 11      | 6           |
|          | 2                      | 19      | 15          | 20      | 14          |
|          | 3                      | 20      | 23          | 24      | 23          |
|          | 4                      | 27      | 24          | 15      | 23          |
|          | 5                      | 33      | 36          | 36      | 38          |

**Number of patients who completed QOL assessment at 9 months by disease progression status (NRG 240)**

| Regimens    | Disease progression | No. | QOL completed at 9 months |    |
|-------------|---------------------|-----|---------------------------|----|
|             |                     |     | No.                       | %  |
| CIS+PAC     | No                  | 34  | 25                        | 74 |
|             | Yes                 | 38  | 22                        | 58 |
| CIS+PAC+BEV | No                  | 47  | 31                        | 66 |
|             | Yes                 | 28  | 16                        | 57 |
| TOP+PAC     | No                  | 31  | 19                        | 61 |
|             | Yes                 | 32  | 23                        | 72 |
| TOP+PAC+BEV | No                  | 41  | 29                        | 71 |
|             | Yes                 | 31  | 22                        | 71 |
